# Supplementary material for: Alternative polyadenylation dependent function of splicing factor SRSF3 contributes to cellular senescence
Source: publisher site journal article supplement (doi:10.18632/aging.101836), 2019-03-04
Supplement: Supplementary file [file aging-v11i5-101836-supplementary-material-SD2.pdf]

## Supplementary Table

**Supplementary Table S1.** Primers used for qRT-PCR, luciferase, overexpression and knockdown.

| Primer Name     | Primer Sequence (5' to 3') | Species | Type |
|-----------------|----------------------------|---------|------|
| H GAPDH-F       | ATGTTCGTCATGGGTGTGAA       | human   | qPCR |
| H GAPDH-R       | GTTGTCATGGATGACCTTGG       | human   | qPCR |
| H SRSF3-F       | CGGCTTTGCTTTTGTGAAT        | human   | qPCR |
| H SRSF3-R       | TGGGCCACGATTTCTACTTC       | human   | qPCR |
| H-CDK1-F        | CTTTTCCATGGGGATCAGA        | human   | qPCR |
| H-CDK1-R        | AGGCTTCCTGGTTTCCATTT       | human   | qPCR |
| H Mki67-F       | TCAAGACCCAGTGAAGGAG        | human   | qPCR |
| H Mki67-R       | AGATGGCTGTTTTGCTGCAT       | human   | qPCR |
| H CDKN1B-F      | CATTTGGTGGACCCAAAGAC       | human   | qPCR |
| H CDKN1B-R      | TTCTGAGGCCAGGCTTCTT        | human   | qPCR |
| H CDKN1A-F      | CGACTGTGATGCGCTAATGG       | human   | qPCR |
| H CDKN1A-R      | CTGCCTCCTCCCAACTCATC       | human   | qPCR |
| M GAPDH-F       | AGGTCGGTGTGAACGGATTTG      | mouse   | qPCR |
| M GAPDH-R       | TGTAGACCATGTAGTTGAGGTCA    | mouse   | qPCR |
| M Mki67-Forward | ACAGGCTCCGTACTTTCCAA       | mouse   | qPCR |
| M Mki67-Reverse | ATCAGACTGCTGCTTTGCTG       | mouse   | qPCR |
| M CDK1-qForward | GGGAATTGTGTTTTGCCACT       | mouse   | qPCR |
| M CDK1-qReverse | TCGGTACCACAGCGTCACTA       | mouse   | qPCR |
| M CDKN2D-F      | GCTCTGGCTTTCGTGAACAT       | mouse   | qPCR |
| M CDKN2D-R      | GGAGAAGGTAGTGGGGTCTT       | mouse   | qPCR |
| M CDKN1A-F      | CGGTGGAACTTTGACTTCGT       | mouse   | qPCR |
| M CDKN1A-R      | CAGGGCAGAGGAAGTACTGG       | mouse   | qPCR |
| M Lmb1-F        | AGGCGAAGAAGAGCGGTAA        | mouse   | qPCR |
| M Lmb1-R        | AATGCTAACACTGCTGCTCG       | mouse   | qPCR |
| M SRSF-F        | TGATTACCGCAGGAGGAGTC       | mouse   | qPCR |
| M SRSF3-R       | GATCGAGACGGCTTGTGATT       | mouse   | qPCR |
| M CCNB1-F       | GGCTGACCCAAACCTCTGTA       | mouse   | qPCR |
| M CCNB1-R       | GGTCTCCTGAAGCAGCCTAA       | mouse   | qPCR |
| H-PTENshort-F   | GCGTGCAGATAATGACAAGG       | human   | qPCR |
| H-PTENshort-R   | GCTAGCCTCTGGATTTGACG       | human   | qPCR |
| H-PTENlong-F    | TTTGGATGTGCAGCAGCTTA       | human   | qPCR |
| H-PTENlong-R    | ATTTGATGCTGCCGGTAAAC       | human   | qPCR |
| H NCOA1short-F  | CAATCTGCAGCCATTCTTCA       | human   | qPCR |
| H NCOA1short-R  | TGTCCAACCTGTTCTGCCTTG      | human   | qPCR |
| H NCOA1long-F   | ACAGTGGAAAGAGGAGCATGG      | human   | qPCR |
| H NCOA1long-R   | AGCCCTTCCACCAATCTTTT       | human   | qPCR |
| H Rbm25short-F  | TGTTGCCATGGTACTTGATGA      | human   | qPCR |
| H Rbm25short-R  | CCTTAAAAGGGTGGCAAAGA       | human   | qPCR |
| H Rbm25long-F   | TTGGTGGGGTCCTTAAACA        | human   | qPCR |
| H Rbm25long-R   | GAGAAGCTGAAGCAGCCATC       | human   | qPCR |
| H DHX36short-F  | ACACAGGAAAAGGCAACTCC       | human   | qPCR |
| H DHX36short-R  | TTGTTTCATGTCCCAGGGTTT      | human   | qPCR |
| H DHX36long-F   | TTCTGTGCAGCTCTGTGTCC       | human   | qPCR |
| H DHX36long-R   | CACTTCTCAGCTGCCATTCA       | human   | qPCR |
| H LAMC1short-F  | GGACATTCGCAATCTGGAGG       | human   | qPCR |
| H LAMC1short-R  | TGCCTTCCAGCCCTAAAGAC       | human   | qPCR |
| H LAMC1long-F   | CCGCAACACAGCCATTATTT       | human   | qPCR |
| H LAMC1long-R   | ATCCCTGTGTCAACCAGCAT       | human   | qPCR |
| H PCGF5short-F  | CCTTTTGCCAAGAATTCCAA       | human   | qPCR |
| H PCGF5short-R  | TGTGATCAGCTGCCAACATT       | human   | qPCR |
| H PCGF5long-F   | AATGGGTACAGAACAAGCA        | human   | qPCR |

|                  |                         |       |      |
|------------------|-------------------------|-------|------|
| H PCGF5long-R    | TGCATCCATTTTCACCCATC    | human | qPCR |
| H CUL4Bshort-F   | CGGTTGAAGAACAAGCAAGC    | human | qPCR |
| H CUL4Bshort-R   | TCCATGTAGTCCCGGTCAAT    | human | qPCR |
| H CUL4Blong-F    | TGTTGTTGAACTCTTGCATGTT  | human | qPCR |
| H CUL4Blong-R    | AAGCAAATAAACCTTTTGCTTCA | human | qPCR |
| H IGF2BP1short-F | AAAAACGGTGAACGAGTTGC    | human | qPCR |
| H IGF2BP1short-R | CCAGGATGTCTCGGATCTTC    | human | qPCR |
| H IGF2BP1long-F  | ACATATGGAAAAGCCCATGC    | human | qPCR |
| H IGF2BP1long-R  | GGGGGAACAAAAAGGAAAAT    | human | qPCR |
| H DDX5short-F    | TCCAACAGGGACTTACCAGAA   | human | qPCR |
| H DDX5short-R    | GAATATCCTGTTGGCATTGGA   | human | qPCR |
| H DDX5long-F     | TGTGAGAACGTGGGTGACTT    | human | qPCR |
| H DDX5long-R     | AGCTTAGCTCCTGGCCATCT    | human | qPCR |
| H HOXC9short-F   | AGACGCTGGAAGTGGAGAAG    | human | qPCR |
| H HOXC9short-R   | AGGCTGGGTAGGGTTAGGA     | human | qPCR |
| H HOXC9long-F    | GCTCTGCGTGCAGATTTTGT    | human | qPCR |
| H HOXC9long-R    | GGGGATGAGAGGGAACACTA    | human | qPCR |
| H RAB2Ashort-F   | ATTAATAATTGGCCCTCAGCA   | human | qPCR |
| H RAB2Ashort-R   | GAGGAGAGGGGGTGAAGAA     | human | qPCR |
| H RAB2Along-F    | GGAATTGCTTGGACACTGAA    | human | qPCR |
| H RAB2Along-R    | GGCAAACAAATCCCTTTCTG    | human | qPCR |
| M DNMT3Ashort-F  | TCTCAACAGCACCATTCCTG    | mouse | qPCR |
| M DNMT3Ashort-R  | TGTGTGGTAGGCACCTGAAA    | mouse | qPCR |
| M DNMT3Along-F   | TAGAAGGGCCGTCTGTATGC    | mouse | qPCR |
| M DNMT3Along-R   | CTTTCCCAGTCTGCTCAAGG    | mouse | qPCR |
| M CREB1short-F   | AAGCAGCACGGAAGAGAGAG    | mouse | qPCR |
| M CREB1short-R   | TTTCAAGCACTGCCACTCTG    | mouse | qPCR |
| M CREB1short-F   | CCCCAGTGGAACCTAGACAT    | mouse | qPCR |
| M CREB1short-R   | CCCTGTTTTGTGCTGACAGT    | mouse | qPCR |
| M PIAS1short-F   | TCCCTGTCTCCTACGTCACC    | mouse | qPCR |
| M PIAS1short-R   | TAAGGCATAGGCGTCATGTG    | mouse | qPCR |
| M PIAS1long-F    | GGATGGGTTTGGGATAGCTT    | mouse | qPCR |
| M PIAS1long-R    | ACAGGTACACAGGCGCTCTT    | mouse | qPCR |
| M FOSL1short-F   | GGAAGTGCAGTGGATGGTG     | mouse | qPCR |
| M FOSL1short-R   | CCCTAGGGCTCGTATGACTC    | mouse | qPCR |
| M FOSL1long-F    | GGCAGCCCAGACTTTGTAGA    | mouse | qPCR |
| M FOSL1long-R    | TCAAAGGGCACCTTCTGTCT    | mouse | qPCR |
| M HDAC4short-F   | CGCTATGACGATGGGAAGT     | mouse | qPCR |
| M HDAC4short-R   | CATCTGGGGCAAACCTCATTT   | mouse | qPCR |
| M HDAC4long-F    | AGATGCCATTTCCCAATCTG    | mouse | qPCR |
| M HDAC4long-R    | TGGAGCACACACAGCTTCAT    | mouse | qPCR |
| M E2F3short-F    | ATTTGGAAAAGCTGCCTCTG    | mouse | qPCR |
| M E2F3short-R    | GGACAACACTGCGATACACG    | mouse | qPCR |
| M E2F3long-F     | TTCTGTTGTTTTCGCCTGTG    | mouse | qPCR |
| M E2F3long-R     | TGCACACGCTTGATTCTTA     | mouse | qPCR |
| M PTENshort-F    | TGGCAATAGGACATTGTGTCA   | mouse | qPCR |
| M PTENshort-R    | ACAAGTGTCAAACCCCTGTGG   | mouse | qPCR |
| M PTENlong-F     | TCGGGAATTTGGTGTCTTTC    | mouse | qPCR |
| M PTENlong-R     | GATGGCGTTCTGCCTAATCT    | mouse | qPCR |
| M MECP2short-F   | AACAGAGAGGAGCCTGTGGA    | mouse | qPCR |
| M MECP2short-R   | AATCGGGAAGCTTTGTCAGA    | mouse | qPCR |
| M MECP2long-F    | CAGGCTGAGGAGACATCACA    | mouse | qPCR |
| M MECP2long-R    | CCTAGCCCCCTCAGTTTTT     | mouse | qPCR |
| M TRAF3short-F   | CTGACCCCTGACAAGAAAGC    | mouse | qPCR |
| M TRAF3short-R   | CTCGACCTCCTTCTCCTCCT    | mouse | qPCR |
| M TRAF3long-F    | CCCTCTCAGCTCACTGTTCC    | mouse | qPCR |

|                   |                                                                    |       |                    |
|-------------------|--------------------------------------------------------------------|-------|--------------------|
| M TRAF3long-R     | TGGTTTGCACACATTGGTTT                                               | mouse | qPCR               |
| M SSBP3short-F    | TGCAAGAAGTGAGGTGTCCA                                               | mouse | qPCR               |
| M SSBP3short-R    | GAGAGTTTTCTGGCCGTTGA                                               | mouse | qPCR               |
| M SSBP3long-F     | GATGGACAGACTTCGGCATT                                               | mouse | qPCR               |
| M SSBP3long-R     | GACAGGCTCCATCATCAGGT                                               | mouse | qPCR               |
| M NEO1short-F     | TGAACCAGATGAGCTGACCA                                               | mouse | qPCR               |
| M NEO1short-R     | AGGCTTGGAGTCATGTCCAG                                               | mouse | qPCR               |
| M NEO1long-F      | TGGGTGATTTTACCCCTTTG                                               | mouse | qPCR               |
| M NEO1long-R      | CCGTCATGTGACCAGCTAGA                                               | mouse | qPCR               |
| M RASA2short-F    | AAGAATGGACATCGGCTTTG                                               | mouse | qPCR               |
| M RASA2short-R    | TTCCCATCAGAAGGAAGCTG                                               | mouse | qPCR               |
| M RASA2long-F     | CAGAGTCCAAGGACAGTCAGG                                              | mouse | qPCR               |
| M RASA2long-R     | TTGCAGAAGCAGAGAAAGGAG                                              | mouse | qPCR               |
| M RAB2Ashort-F    | CCAAGAAGGGTCTTTGACA                                                | mouse | qPCR               |
| M RAB2Ashort-R    | AGCTAGCCGGTAACACCAGA                                               | mouse | qPCR               |
| M RAB2Along-F     | GAGACCGCTTCACAAAAGGA                                               | mouse | qPCR               |
| M RAB2Along-R     | GGGAAGAGTAAGTGGCATGG                                               | mouse | qPCR               |
| M DHX36short-F    | CCCTGGGTTATGACTTGCTT                                               | mouse | qPCR               |
| M DHX36short-R    | TGGGAATTCTCCCAAAGTGT                                               | mouse | qPCR               |
| M DHX36long-F     | TGCTGGTTCAGGTAAGTGTG                                               | mouse | qPCR               |
| M DHX36long-R     | CCTTGACTTTAGGGGCAAAA                                               | mouse | Luciferase         |
| M_PTENshortUTR-F  | CCGCTCGAGCCAGAGAATGAACCTT<br>TTGATG                                | mouse | Luciferase         |
| M_PTENshortUTR-R  | CGGGTTTAAACTGGAATAAAATGGG<br>AAAGTGC                               | mouse | Luciferase         |
| M_PTENlongUTR-F   | CGGGTTTAAACTGACAAGAATGAGA<br>CTTTAATC                              | mouse | Luciferase         |
| M_PIAS1shortUTR-F | CCGCTCGAGCGCTCTCACCCCTGCTG<br>CT                                   | mouse | Luciferase         |
| M_PIAS1shortUTR-R | CGGGTTTAAACTGAAAATATAGTTTT<br>GTTCTC                               | mouse | Luciferase         |
| M_PIAS1longUTR-R  | CGGGTTTAAACAACCTGATAACAAAT<br>GTCTTG                               | mouse | Luciferase         |
| H_PTENshortUTR-F  | CCGCTCGAGTAGAGGAGCCGTCAAA<br>TCCA                                  | human | Luciferase         |
| H_PTENshortUTR-R  | CGGGTTTAAACTCAGTTTATTCAAGT<br>TTATT                                | human | Luciferase         |
| H_PTENlongUTR-R   | CGGGTTTAAACTGACAAGAATGAGA<br>CTTTAA                                | human | Luciferase         |
| H_PTENOE-F        | CGGAATTCGCCACC<br>TTCCATCCTGCAGAAGAAGC                             | human | Over<br>expression |
| H_PTENOE-R        | CGCGGATCC<br>CTTATCGTCGTCATCCTTGTAATC<br>GACTTTTGTAATTTGTGTATGCTGA | human | Over<br>expression |
| M_PTENOE-F        | GAATTCGCCACCACAGGCTCCAG<br>CATGACA                                 | mouse | Over<br>expression |
| M_PTENOE-R        | GGATCCGACTTTTGTAATTTGTGAAT<br>GCTGA                                | mouse | Over<br>expression |
| M_PIAS1OE-F       | GAATTCGCCACCCAAGATGGCGGAC<br>AGTGC                                 | mouse | Over<br>expression |
| M_PIAS1OE-R       | GGATCCGTCCAATGAGATAATGTCTG<br>G                                    | mouse | Over<br>expression |
| M_DNMT3AOE-F      | GAATTCGCCACCGCCTACTGCCAG<br>CAATG                                  | mouse | Over<br>expression |
| M_DNMT3AOE-R      | GGATCCCACACAAGCAAAATATTCC<br>TTCAGC                                | mouse | Over<br>expression |
| H_SRSF3shRNA1-F   | CCGGTGGAACTGTCAATGGTGAAA                                           | human | Knock down         |

|                 |                                                                         |       |            |
|-----------------|-------------------------------------------------------------------------|-------|------------|
|                 | CTCGAGTTTCACCATTCGACAGTTCC<br>ATTTTTG                                   |       |            |
| H_SRSF3shRNA1-R | AATTCAAAAATGGAAGTGTGCAATG<br>GTGAAACTCGAGTTTCACCATTCGA<br>CAGTTCCA      | human | Knock down |
| H_SRSF3shRNA2-F | CCGGCGAGAGCTAGATGGAAGAAC<br>ACTCGAGTGTCTTCCATCTAGCTCT<br>CGTTTTG        | human | Knock down |
| H_SRSF3shRNA2-R | AATTCAAAAACGAGAGCTAGATGGA<br>AGAACACTCGAGTGTCTTCCATCTA<br>GCTCTCG       | human | Knock down |
| M_SRSF3shRNA1-F | CCGGTAAGAGTGGAACTGTGCAATG<br>CTCGAGCATTTCGACAGTTCCACTCTT<br>ATTTTTG     | mouse | Knock down |
| M_SRSF3shRNA1-R | AATTCAAAAATAAGAGTGGAACTGT<br>CGAATG<br>CTCGAGCATTTCGACAGTTCCACTCTT<br>A | mouse | Knock down |
| M_SRSF3shRNA2-F | CCGGGCGGAAATTGAAAGAAGCTAT<br>CTCGAGATAGCTTCTTTCAATTTCCG<br>CTTTTTG      | mouse | Knock down |
| M_SRSF3shRNA2-R | AATTCAAAAAGCGGAAATTGAAAGA<br>AGCTATCTCGAGATAGCTTCTTTCAA<br>TTTCCGC      | mouse | Knock down |
